# Supplementary material for: The accuracy of anal self- and companion exams among sexual minority men and transgender women: a prospective analysis
Source: PubMed Central journal article supplement (PMC10910307; doi:10.1016/j.lana.2024.100704), 2024-02-29
Supplement: mmc1.pdf [file mmc1.pdf]

## Supplementary Material

A prospective analysis of the accuracy of anal self- and companion exams among sexual minority men and transgender women: The Prevent Anal Cancer Palpation Study

### Contents

**Supplementary Table 1.** Characteristics of individuals conducting lay anal examinations and concordance with clinician examinations by city in Chicago, Illinois and Houston, Texas, USA 2020-2022

**Supplementary Figure 1.** Study flow

**Supplementary Table 2.** Primary lesion characteristics for 245 individuals stratified by gender identity in Chicago, Illinois and Houston, Texas, USA 2020-2022

**Supplementary Figure 2.** Agreement and accuracy for lay anal examinations compared with clinician examinations by examination type in Chicago, Illinois and Houston, Texas, USA 2020-2022. ASE=anal self-examination, ACE=anal companion examination, PPV=positive predictive value, NPV=negative predictive value

**Supplementary Table 3.** Stratified sensitivity estimates for lay anal examinations compared with clinician examination in Chicago, Illinois and Houston, Texas, USA 2020-2022

**Supplementary Table 4.** Factors associated with concordance between anal self-examinations and clinician examinations in Chicago, Illinois and Houston, Texas, USA 2020-2022, bivariate and multivariable analyses

**Supplementary Table 1.** Characteristics of individuals conducting lay anal examinations and concordance with clinician examinations by city in Chicago, Illinois and Houston, Texas, USA 2020–2022

|                                              | Chicago          |  | Concordance<br>(95% CI) |                | Houston          |  | Concordance<br>(95% CI) |                |
|----------------------------------------------|------------------|--|-------------------------|----------------|------------------|--|-------------------------|----------------|
|                                              |                  |  |                         |                |                  |  |                         |                |
| <b>Overall</b>                               | 370/370 (100.0%) |  | 0.76                    | (0.72 to 0.81) | 344/344 (100.0%) |  | 0.70                    | (0.65 to 0.75) |
| <b>Age, years</b>                            | 37 (30-51)       |  |                         |                | 46 (35-56)       |  |                         |                |
| <b>Age, years</b>                            |                  |  |                         |                |                  |  |                         |                |
| 25-34                                        | 162/370 (43.8%)  |  | 0.78                    | (0.72 to 0.85) | 90/344 (26.2%)   |  | 0.79                    | (0.70 to 0.87) |
| 35-44                                        | 92/370 (24.9%)   |  | 0.79                    | (0.71 to 0.88) | 69/344 (20.1%)   |  | 0.61                    | (0.49 to 0.72) |
| 45-54                                        | 54/370 (14.6%)   |  | 0.74                    | (0.62 to 0.86) | 91/344 (26.5%)   |  | 0.73                    | (0.63 to 0.82) |
| 55-81                                        | 62/370 (16.8%)   |  | 0.68                    | (0.56 to 0.79) | 94/344 (27.3%)   |  | 0.66                    | (0.56 to 0.76) |
| <b>Waist circumference, cm</b>               |                  |  |                         |                |                  |  |                         |                |
| ≤102                                         | 262/370 (70.8%)  |  | 0.81                    | (0.76 to 0.85) | 211/338 (62.4%)  |  | 0.69                    | (0.63 to 0.75) |
| >102                                         | 108/370 (29.2%)  |  | 0.66                    | (0.57 to 0.75) | 127/338 (37.6%)  |  | 0.71                    | (0.63 to 0.79) |
| <b>Sex at Birth</b>                          |                  |  |                         |                |                  |  |                         |                |
| Male                                         | 368/370 (99.5%)  |  | 0.76                    | (0.72 to 0.81) | 335/344 (97.4%)  |  | 0.70                    | (0.65 to 0.75) |
| Female                                       | 2/370 (0.5%)     |  | 0.50                    | (0 to 1)       | 9/344 (2.6%)     |  | 0.67                    | (0.30 to 0.93) |
| <b>Gender identity</b>                       |                  |  |                         |                |                  |  |                         |                |
| Man                                          | 344/369 (93.2%)  |  | 0.76                    | (0.71 to 0.80) | 327/344 (95.1%)  |  | 0.69                    | (0.64 to 0.74) |
| Non-binary                                   | 16/369 (4.3%)    |  | 0.88                    | (0.71 to 1.00) | 2/344 (0.6%)     |  | 1.0                     | n/a            |
| Transgender woman                            | 5/369 (1.4%)     |  | 0.80                    | (0.45 to 1.00) | 6/344 (1.7%)     |  | 0.83                    | (0.54 to 1.00) |
| Transgender man                              | 1/369 (0.3%)     |  | 1.0                     | n/a            | 8/344 (2.3%)     |  | 0.75                    | (0.45 to 1.00) |
| Woman or other                               | 3/369 (0.8%)     |  | 0.67                    | (0.13 to 1.00) | 1/344 (0.3%)     |  | 1.0                     | n/a            |
| <b>Race/ethnicity</b>                        |                  |  |                         |                |                  |  |                         |                |
| White, non-Hispanic                          | 149/370 (40.3%)  |  | 0.75                    | (0.68 to 0.82) | 185/340 (54.4%)  |  | 0.70                    | (0.63 to 0.76) |
| Black, non-Hispanic                          | 120/370 (32.4%)  |  | 0.79                    | (0.72 to 0.86) | 46/340 (13.5%)   |  | 0.80                    | (0.69 to 0.92) |
| Hispanic                                     | 76/370 (20.5%)   |  | 0.72                    | (0.62 to 0.82) | 87/340 (25.6%)   |  | 0.66                    | (0.56 to 0.76) |
| Asian, non-Hispanic                          | 16/370 (4.3%)    |  | 0.88                    | (0.71 to 1.00) | 16/340 (4.7%)    |  | 0.75                    | (0.54 to 0.96) |
| Other, non-Hispanic†                         | 9/370 (2.4%)     |  | 0.78                    | (0.51 to 1.00) | 6/340 (1.8%)     |  | 0.50                    | (0.10 to 0.90) |
| <b>Sexual orientation</b>                    |                  |  |                         |                |                  |  |                         |                |
| Gay                                          | 296/370 (80.0%)  |  | 0.75                    | (0.70 to 0.80) | 305/343 (88.9%)  |  | 0.68                    | (0.63 to 0.73) |
| Bisexual                                     | 40/370 (10.8%)   |  | 0.83                    | (0.71 to 0.94) | 27/343 (7.9%)    |  | 0.81                    | (0.67 to 0.96) |
| Queer                                        | 28/370 (8.0%)    |  | 0.75                    | (0.59 to 0.91) | 7/343 (2.0%)     |  | 1.0                     | n/a            |
| Heterosexual, lesbian, I don't know or other | 6/370 (1.6%)     |  | 0.83                    | (0.54 to 1.00) | 4/343 (1.2%)     |  | 1.0                     | n/a            |
| <b>HIV status, self-report</b>               |                  |  |                         |                |                  |  |                         |                |
| Negative                                     | 272/362 (65.1%)  |  | 0.78                    | (0.73 to 0.83) | 172/341 (50.4%)  |  | 0.72                    | (0.65 to 0.79) |
| Positive                                     | 90/362 (24.9%)   |  | 0.72                    | (0.63 to 0.81) | 169/341 (49.6%)  |  | 0.68                    | (0.61 to 0.75) |
| <b>Dexterity-related medical condition*</b>  |                  |  |                         |                |                  |  |                         |                |
| No                                           | 258/351 (73.5%)  |  | 0.77                    | (0.72 to 0.82) | 215/341 (63.1%)  |  | 0.72                    | (0.66 to 0.78) |
| Yes                                          | 93/351 (26.5%)   |  | 0.72                    | (0.62 to 0.81) | 126/341 (37.0%)  |  | 0.66                    | (0.58 to 0.74) |
| <b>Lay anal examination type</b>             |                  |  |                         |                |                  |  |                         |                |
| Anal self-examination                        | 352/370 (95.1%)  |  | 0.76                    | (0.71 to 0.80) | 306/344 (89.0%)  |  | 0.70                    | (0.65 to 0.75) |
| Anal companion examination                   | 18/370 (4.9%)    |  | 0.89                    | (0.74 to 1.00) | 38/344 (11.1%)   |  | 0.68                    | (0.54 to 0.83) |
| <b>Trainer type</b>                          |                  |  |                         |                |                  |  |                         |                |
| Clinician                                    | 84/370 (22.7%)   |  | 0.86                    | (0.78 to 0.93) | 2/344 (0.6%)     |  | 0.50                    | (0.00 to 1.00) |
| Non-clinician                                | 286/370 (77.3%)  |  | 0.73                    | (0.68 to 0.79) | 342/344 (99.4%)  |  | 0.70                    | (0.65 to 0.75) |
| <b>Clinician type</b>                        |                  |  |                         |                |                  |  |                         |                |
| Medical doctor                               | 301/370 (81.4%)  |  | 0.78                    | (0.74 to 0.83) | 0/344            |  | 0.0                     | n/a            |
| Advanced practice provider                   | 69/370 (18.7%)   |  | 0.67                    | (0.56 to 0.78) | 344/344 (100.0%) |  | 0.70                    | (0.65 to 0.75) |
| <b>Recruitment source</b>                    |                  |  |                         |                |                  |  |                         |                |
| Social media                                 | 236/367 (64.3%)  |  | 0.76                    | (0.70 to 0.81) | 68/344 (19.8%)   |  | 0.71                    | (0.60 to 0.81) |
| Clinics                                      | 22/367 (6.0%)    |  | 0.73                    | (0.54 to 0.91) | 147/344 (42.7%)  |  | 0.69                    | (0.61 to 0.76) |
| Friends                                      | 44/367 (12.0%)   |  | 0.77                    | (0.65 to 0.90) | 84/344 (24.4%)   |  | 0.71                    | (0.62 to 0.81) |
| Flyers/advertisement                         | 61/367 (16.6%)   |  | 0.77                    | (0.67 to 0.88) | 38/344 (11.1%)   |  | 0.68                    | (0.54 to 0.83) |
| Other                                        | 4/367 (1.1%)     |  | 0.75                    | (0.33 to 1.00) | 7/344 (2.0%)     |  | 0.86                    | (0.60 to 1.00) |
| <b>Lay anal examination results</b>          |                  |  |                         |                |                  |  |                         |                |
| True negative                                | 198/370 (53.5%)  |  | n/a                     |                | 178/344 (51.7%)  |  | n/a                     |                |
| True positive                                | 84/370 (22.7%)   |  | n/a                     |                | 63/344 (18.3%)   |  | n/a                     |                |
| False negative                               | 39/370 (10.5%)   |  | n/a                     |                | 60/344 (17.4%)   |  | n/a                     |                |
| False positive                               | 49/370 (13.2%)   |  | n/a                     |                | 43/344 (12.5%)   |  | n/a                     |                |
| <b>Preferred anal sex position</b>           |                  |  |                         |                |                  |  |                         |                |
| Insertive                                    | 91/356 (25.6%)   |  | 0.77                    | (0.68 to 0.86) | 72/337 (21.4%)   |  | 0.69                    | (0.59 to 0.80) |
| Versatile                                    | 137/356 (38.5%)  |  | 0.74                    | (0.67 to 0.82) | 144/337 (42.7%)  |  | 0.73                    | (0.66 to 0.80) |
| Receptive                                    | 127/356 (35.7%)  |  | 0.75                    | (0.67 to 0.82) | 118/337 (35.0%)  |  | 0.66                    | (0.58 to 0.75) |
| Never had anal sex                           | 1/356 (0.3%)     |  | 1.0                     | n/a            | 3/337 (0.9%)     |  | 1.0                     | n/a            |
| <b>Difficulty with ASE/ACE</b>               |                  |  |                         |                |                  |  |                         |                |
| Easy or Very Easy                            | 330/367 (89.9%)  |  | 0.77                    | (0.73 to 0.82) | 310/341 (90.9%)  |  | 0.71                    | (0.66 to 0.76) |
| Hard or Very Hard                            | 37/367 (10.1%)   |  | 0.65                    | (0.49 to 0.80) | 31/341 (9.1%)    |  | 0.58                    | (0.41 to 0.75) |
| <b>Pain with ASE/ACE</b>                     |                  |  |                         |                |                  |  |                         |                |
| None                                         | 359/367 (97.8%)  |  | 0.76                    | (0.71 to 0.80) | 322/343 (93.9%)  |  | 0.69                    | (0.64 to 0.74) |
| A little                                     | 6/367 (1.6%)     |  | 0.83                    | (0.54 to 1.00) | 17/343 (5.0%)    |  | 0.76                    | (0.56 to 0.97) |
| A lot                                        | 1/367 (0.3%)     |  | 1.0                     | n/a            | 1/343 (0.3%)     |  | 1.0                     | n/a            |

|                                                                   |                 |      |                |                 |      |                |
|-------------------------------------------------------------------|-----------------|------|----------------|-----------------|------|----------------|
| I don't know                                                      | 1/367 (0.3%)    | 1.0  | n/a            | 3/343 (0.9%)    | 1.0  | n/a            |
| <b>Ever checked anus for disease</b>                              |                 |      |                |                 |      |                |
| No or I don't know                                                | 196/369 (53.1%) | 0.74 | (0.68 to 0.80) | 189/344 (54.9%) | 0.69 | (0.62 to 0.75) |
| Yes                                                               | 173/369 (46.9%) | 0.79 | (0.73 to 0.85) | 155/344 (45.1%) | 0.72 | (0.65 to 0.79) |
| <b>Worry about getting anal cancer</b>                            |                 |      |                |                 |      |                |
| None                                                              | 219/367 (59.7%) | 0.76 | (0.70 to 0.81) | 202/343 (58.9%) | 0.72 | (0.66 to 0.78) |
| A little                                                          | 101/367 (27.5%) | 0.75 | (0.67 to 0.84) | 103/343 (30.0%) | 0.65 | (0.56 to 0.74) |
| Some                                                              | 35/367 (9.5%)   | 0.89 | (0.78 to 0.99) | 33/343 (9.6%)   | 0.76 | (0.61 to 0.90) |
| Quite a lot                                                       | 12/367 (3.3%)   | 0.50 | (0.22 to 0.78) | 5/343 (1.5%)    | 0.60 | (0.22 to 1.00) |
| <b>Plans to do ASE/ACE in the future</b>                          |                 |      |                |                 |      |                |
| Strongly agree                                                    | 257/366 (70.2%) | 0.78 | (0.73 to 0.83) | 251/343 (73.2%) | 0.70 | (0.64 to 0.76) |
| Agree                                                             | 99/366 (27.1%)  | 0.71 | (0.62 to 0.80) | 85/343 (24.8%)  | 0.71 | (0.61 to 0.80) |
| Disagree                                                          | 1/366 (0.3%)    | 1.0  | n/a            | 2/343 (0.6%)    | 1.0  | n/a            |
| Strongly Disagree                                                 | 2/366 (0.6%)    | 0.0  | n/a            | 0/343           | 0.0  | n/a            |
| I don't know                                                      | 7/366 (1.9%)    | 1.0  | n/a            | 5/343 (1.5%)    | 0.40 | (0.00 to 0.83) |
| <b>Would see a doctor for a persistent anal problem</b>           |                 |      |                |                 |      |                |
| Strongly agree                                                    | 245/368 (66.6%) | 0.76 | (0.71 to 0.82) | 236/343 (68.8%) | 0.70 | (0.65 to 0.76) |
| Agree                                                             | 96/368 (26.1%)  | 0.82 | (0.75 to 0.90) | 87/343 (25.4%)  | 0.69 | (0.59 to 0.79) |
| Disagree                                                          | 5/368 (1.4%)    | 0.60 | (0.17 to 1.00) | 7/343 (2.0%)    | 0.71 | (0.38 to 1.00) |
| Strongly Disagree                                                 | 3/368 (0.8%)    | 0.33 | (0.00 to 0.87) | 0/343           | 0.0  | n/a            |
| I don't know                                                      | 19/368 (5.2%)   | 0.53 | (0.30 to 0.75) | 13/343 (3.8%)   | 0.69 | (0.44 to 0.94) |
| <b>Preference for ASE/ACE or doctor-provided exam<sup>s</sup></b> |                 |      |                |                 |      |                |
| ASE or ACE                                                        | 121/364 (33.2%) | 0.80 | (0.73 to 0.87) | 123/341 (36.1%) | 0.70 | (0.62 to 0.78) |
| Doctor-provided exam                                              | 243/364 (66.8%) | 0.74 | (0.68 to 0.79) | 218/341 (63.9%) | 0.71 | (0.65 to 0.77) |

Data are n (%) or median (interquartile range). † Other includes Native American or Alaskan Native, Hawaiian or Pacific Islander, other, and I don't know. \* Conditions were arthritis, carpal tunnel syndrome, cerebral palsy, diabetes, fibromyalgia, chronic lower back pain, motor neuron diseases, multiple sclerosis, obesity, spina bifida, spinal cord injury, stroke, and other (neuropathy, lower back nerve compression, tremors in hand, McArdle disease, autism, scoliosis, knee pain, scapular dyskinesis, transverse myelitis, osteoporosis, thoracic outlet syndrome, cervicalgia, causalgia and herniated disc). Abbreviations: ASE/ACE, anal self-examination, or anal companion examination; n/a, not applicable.

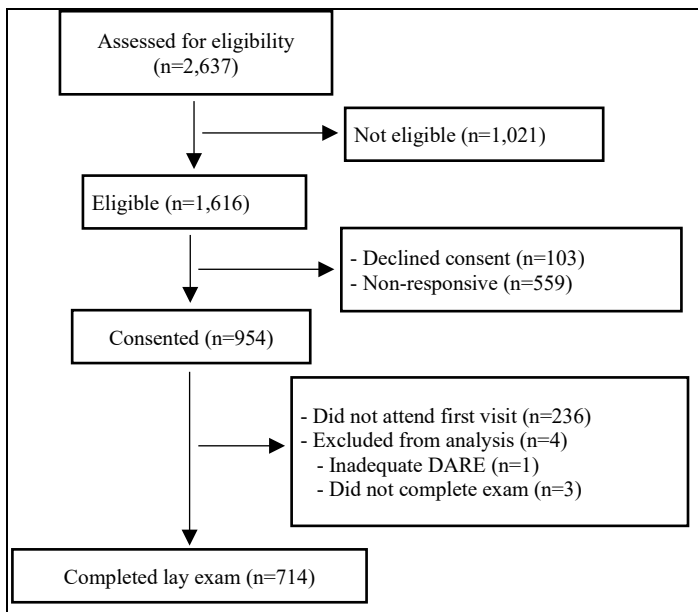

**Supplementary Figure 1.** Study flow.

| <b>Supplementary Table 2.</b> Primary lesion characteristics for 245 individuals by gender identity in Chicago, Illinois and Houston, Texas, USA 2020-2022 |                                             |                          |                         |                         |                                |                         |                              |                         |
|------------------------------------------------------------------------------------------------------------------------------------------------------------|---------------------------------------------|--------------------------|-------------------------|-------------------------|--------------------------------|-------------------------|------------------------------|-------------------------|
|                                                                                                                                                            | <b>Gender identity (# of participants)*</b> |                          |                         |                         |                                |                         |                              |                         |
|                                                                                                                                                            | <b>Man (n=236)</b>                          |                          | <b>Non-binary (n=2)</b> |                         | <b>Transgender woman (n=3)</b> |                         | <b>Transgender Man (n=4)</b> |                         |
|                                                                                                                                                            | <b>Anatomic site (# of participants)†</b>   |                          |                         |                         |                                |                         |                              |                         |
|                                                                                                                                                            | <b>Perianus (n=183)</b>                     | <b>Anal canal (n=90)</b> | <b>Perianus (n=1)</b>   | <b>Anal canal (n=2)</b> | <b>Perianus (n=3)</b>          | <b>Anal canal (n=1)</b> | <b>Perianus (n=3)</b>        | <b>Anal canal (n=1)</b> |
| <b>Clinician-detected lesions</b>                                                                                                                          |                                             |                          |                         |                         |                                |                         |                              |                         |
| <b>Lesion size, mm, IQR</b>                                                                                                                                | 3, 2-4                                      | 3, 2-3                   | 6, 6-6                  | 3, 3-3                  | 3, 1-10                        | 3, n/a                  | 4, 3-6                       | 2, n/a                  |
| <b>Lesion type</b>                                                                                                                                         |                                             |                          |                         |                         |                                |                         |                              |                         |
| Haemorrhoids                                                                                                                                               | 53/183 (29.0%)                              | 43/90 (47.8%)            |                         |                         |                                |                         |                              | 1/1 (100.0%)            |
| Skin fold/flaps/tags                                                                                                                                       | 87/183 (47.5%)                              | 6/90 (6.7%)              |                         |                         |                                |                         | 3/3 (100.0%)                 |                         |
| Scar                                                                                                                                                       | 11/183 (6.0%)                               | 13/90 (14.4%)            |                         | 1/2 (50.0%)             | 1/3 (33%)                      |                         |                              |                         |
| Condyloma                                                                                                                                                  | 12/183 (6.6%)                               | 8/90 (8.9%)              | 1/1 (100.0%)            | 1/2 (50.0%)             | 1/3 (33%)                      |                         |                              |                         |
| Suspicious lump or thickening                                                                                                                              | 2/183 (1.1%)                                | 2/90 (1.1%)              |                         |                         |                                | 1/1 (100.0%)            |                              |                         |
| Papule                                                                                                                                                     | 9/183 (4.9%)                                | 6/90 (6.7%)              |                         |                         |                                |                         |                              |                         |
| Anal fissure                                                                                                                                               | n/a                                         | 1/90 (1.1%)              |                         |                         |                                |                         |                              |                         |
| Other                                                                                                                                                      | 4/183 (2.2)                                 | 0/90                     |                         |                         | 1/3 (33%)                      |                         |                              |                         |
| Perianal lichenification                                                                                                                                   | 1/183 (0.6)                                 | n/a                      |                         |                         |                                |                         |                              |                         |
| Perianal psoriasis                                                                                                                                         | 1/183 (0.6)                                 | n/a                      |                         |                         |                                |                         |                              |                         |
| Cyst                                                                                                                                                       | 1/183 (0.6)                                 | n/a                      |                         |                         |                                |                         |                              |                         |
| <b>HCP referred participant</b>                                                                                                                            |                                             |                          |                         |                         |                                |                         |                              |                         |
| No                                                                                                                                                         | 161/183(88.0%)                              | 62/90 (68.9%)            |                         | 1/2 (50.0%)             | 2/3 (66.7%)                    | 0/1                     | 3/3 (100.0%)                 | 1/1 (100.0%)            |
| Yes                                                                                                                                                        | 22/183 (12.0%)                              | 28/90 (31.1%)            |                         | 1/2 (50.0%)             | 1/3 (33.3%)                    | 1/1 (100.0%)            |                              | 0                       |

Note. Data are median, IQR and n and (%). \* No lesions were detected in individuals identifying as Woman or Other. †Number of lesions at each anatomic site does not equal total number of participants with lesions due to lesions at both anatomic sites in some individuals. Abbreviations: IQR, interquartile range; n/a, not applicable; HCP, health care provider; ASE, anal self-exam; ACE, anal companion exam.

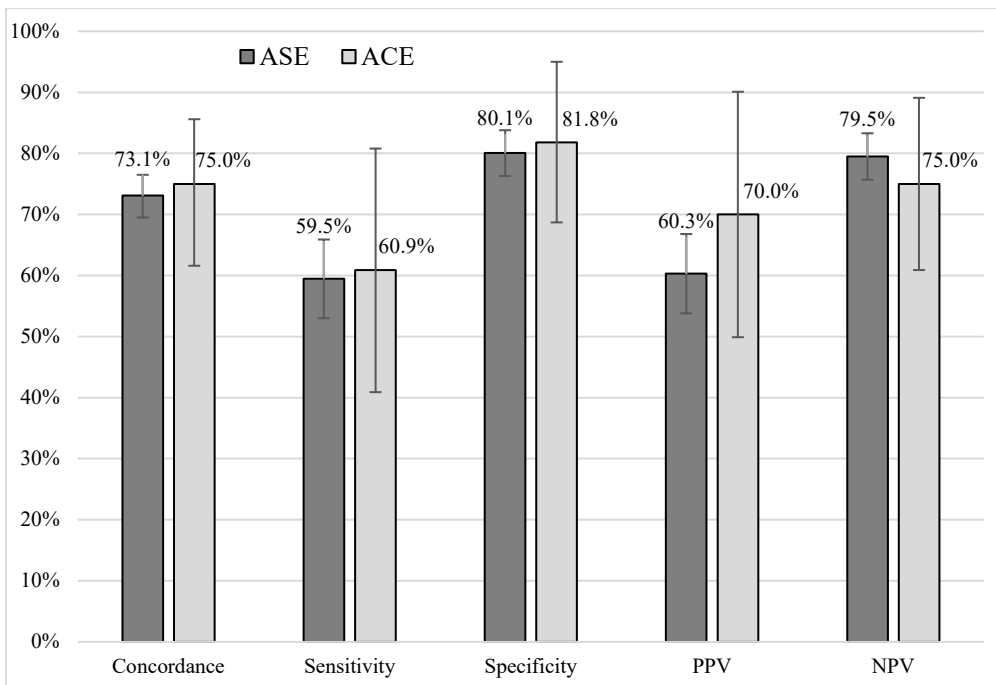

**Supplementary Figure 2.** Agreement and accuracy for lay anal examinations compared with clinician examinations by examination type in Chicago, Illinois and Houston, Texas, USA 2020-2022. ASE=anal self-examination, ACE=anal companion examination, PPV=positive predictive value, NPV=negative predictive value.

**Supplementary Table 3.** Stratified sensitivity estimates for lay anal examinations compared with clinician examinations in Chicago, Illinois and Houston, Texas, USA 2020-2022

| <b>Stratification variable</b>               | <b>Sensitivity (95% CI)</b> |             |
|----------------------------------------------|-----------------------------|-------------|
| <b>Age, years</b>                            |                             |             |
| <45                                          | 64.7                        | (56.1-73.3) |
| ≥45                                          | 54.8                        | (46.1-63.5) |
| <b>Waist circumference, cm</b>               |                             |             |
| ≤102                                         | 60.4                        | (52.9-67.9) |
| >102                                         | 58.0                        | (47.3-68.8) |
| <b>HIV status, self-report</b>               |                             |             |
| Negative                                     | 62.5                        | (54.4-70.6) |
| Positive                                     | 56.2                        | (46.7-65.7) |
| <b>Dexterity-related medical condition</b>   |                             |             |
| No                                           | 61.4                        | (53.7-69.2) |
| Yes                                          | 56.5                        | (45.9-67.0) |
| <b>Preferred anal sex position</b>           |                             |             |
| Insertive                                    | 52.9                        | (39.2-66.6) |
| Versatile                                    | 62.4                        | (52.5-72.2) |
| Receptive                                    | 60.0                        | (50.2-69.9) |
| Never had anal sex                           | 100.0                       | n/a         |
| <b>Trainer type</b>                          |                             |             |
| Clinician                                    | 70.4                        | (53.2-87.6) |
| Non-Clinician                                | 58.3                        | (51.7-64.8) |
| <b>Lesion size (n=245)</b>                   |                             |             |
| <5 mm                                        | 58.4                        | (51.5-65.3) |
| ≥5 mm                                        | 64.6                        | (51.1-78.1) |
| <b>Referral for any lesion (n=245)</b>       |                             |             |
| No                                           | 58.8                        | (52.0-65.6) |
| Yes                                          | 63.0                        | (49.1-77.0) |
| <b>Referral for anal canal lesion (n=94)</b> |                             |             |
| No                                           | 59.5                        | (53.0-66.1) |
| Yes                                          | 60.0                        | (42.5-77.5) |
| <b>Referral for perianal lesion (n=190)</b>  |                             |             |
| No                                           | 57.9                        | (51.4-64.4) |
| Yes                                          | 75.0                        | (57.7-92.3) |

Note. Numbers are percent.

**Supplementary Table 4.** Factors associated with concordance between anal self-examinations and clinician examinations in Chicago, Illinois and Houston, Texas, USA 2020-2022, bivariate and multivariable analyses

| Characteristic                             | PR (95% CI)             | aPR* (95% CI)           |
|--------------------------------------------|-------------------------|-------------------------|
| <b>Age, years</b>                          |                         |                         |
| 25-34                                      | 1.0                     | 1.0                     |
| 35-44                                      | 0.91 (0.81-1.03)        | 0.92 (0.81-1.04)        |
| 45-54                                      | 0.92 (0.81-1.04)        | 0.94 (0.83-1.06)        |
| 55-81                                      | <b>0.83 (0.73-0.95)</b> | <b>0.85 (0.74-0.97)</b> |
| <b>Waist, cm</b>                           |                         |                         |
| ≤ 102                                      | 1.0                     |                         |
| > 102                                      | 0.92 (0.83-1.02)        | -                       |
| <b>Sexual orientation</b>                  |                         |                         |
| Gay                                        | 1.0                     |                         |
| Bisexual                                   | <b>1.15 (1.01-1.31)</b> | -                       |
| Queer                                      | 1.11 (0.93-1.33)        | -                       |
| Heterosexual, lesbian, don't know or other | <b>1.26 (1.02-1.56)</b> | -                       |
| <b>HIV status, self-report</b>             |                         |                         |
| Negative                                   | 1.0                     | -                       |
| Positive                                   | 0.92 (0.83-1.02)        | -                       |
| <b>Difficulty with ASE/ACE</b>             |                         |                         |
| Hard or Very Hard                          | 1.0                     |                         |
| Easy or Very Easy                          | 1.20 (0.99-1.46)        | -                       |
| <b>Trainer type</b>                        |                         |                         |
| Clinician                                  | 1.0                     | 1.0                     |
| Non-clinician                              | <b>0.84 (0.76-0.93)</b> | <b>0.86 (0.77-0.97)</b> |
| <b>Clinician type</b>                      |                         |                         |
| Medical doctor                             | 1.0                     |                         |
| Advanced practice provider                 | <b>0.89 (0.81-0.98)</b> | -                       |
| <b>Worried about getting anal cancer</b>   |                         |                         |
| None                                       | 1.0                     | 1.0                     |
| A little                                   | 0.95 (0.85-1.06)        | 0.97 (0.86-1.08)        |
| Some                                       | <b>1.13 (1.00-1.28)</b> | <b>1.14 (1.01-1.29)</b> |
| Quite a lot                                | 0.63 (0.37-1.09)        | 0.63 (0.37-1.06)        |

Note. Confidence intervals in bold do not include unity. \* Variables remaining in model are adjusted for each other and city. Abbreviations: PR, prevalence ratio; aPR, adjusted prevalence ratio; ASE/ACE, anal self-examination, or anal companion examination.
